# Supplementary material
Source: PubMed Central journal article supplement (PMC6746226)
Supplement: NIHMS1049988-supplement-supplement.pdf [file NIHMS1049988-supplement-supplement.pdf]

# **B-Cell Depletion Reduces the Development of Cerebral Cavernous Malformations in Murine Models**

Changbin Shi <sup>1,4</sup>, Robert Shenkar <sup>1</sup>, Hussein A. Zeineddine <sup>1</sup>, Romuald Girard <sup>1</sup>,  
Maged D. Fam <sup>1</sup>, Cecilia Austin <sup>1</sup>, Thomas Moore <sup>1</sup>, Rhonda Lightle <sup>1</sup>, Lingjiao Zhang <sup>1</sup>,  
Meijing Wu <sup>1</sup>, Ying Cao <sup>1</sup>, Murat Gunel <sup>2</sup>, Angeliki Louvi <sup>2</sup>, Autumn Rorrer <sup>3</sup>, Carol Gallione <sup>3</sup>,  
Douglas A. Marchuk <sup>3</sup>, Issam A. Awad <sup>1</sup>

<sup>1</sup> Neurovascular Surgery Program, Section of Neurosurgery, Biological Sciences Division, University of Chicago, USA

<sup>2</sup> Department of Neurosurgery, Yale University School of Medicine, USA

<sup>3</sup> Molecular Genetics and Microbiology Department, Duke University Medical Center, USA

<sup>4</sup> Present affiliation: Department of Neurosurgery, The First Affiliated Hospital of Harbin Medical University, Harbin, Heilongjiang Province, China.

**Changbin Shi and Robert Shenkar contributed equally to this work.**

**Douglas A. Marchuk and Issam A. Awad contributed equally to this work.**

Corresponding author: Issam A. Awad, MD, Section of Neurosurgery, The University of Chicago Medicine, 5841 S. Maryland Ave. MC3026/Room J341, Chicago, IL 60637, USA.  
Tel.: +1 773 702 4452; fax: +1 773 702 3518.  
*E-mail address:* [iawad@uchicago.edu](mailto:iawad@uchicago.edu) (I.A. Awad).

# SUPPLEMENTARY FIGURES AND LEGENDS

## Supplementary Figure 1

a

**B cell depletion from blood and spleen was confirmed in 5 out of 5 *Ccm3<sup>-/-</sup>Trp53<sup>-/-</sup>* mice**

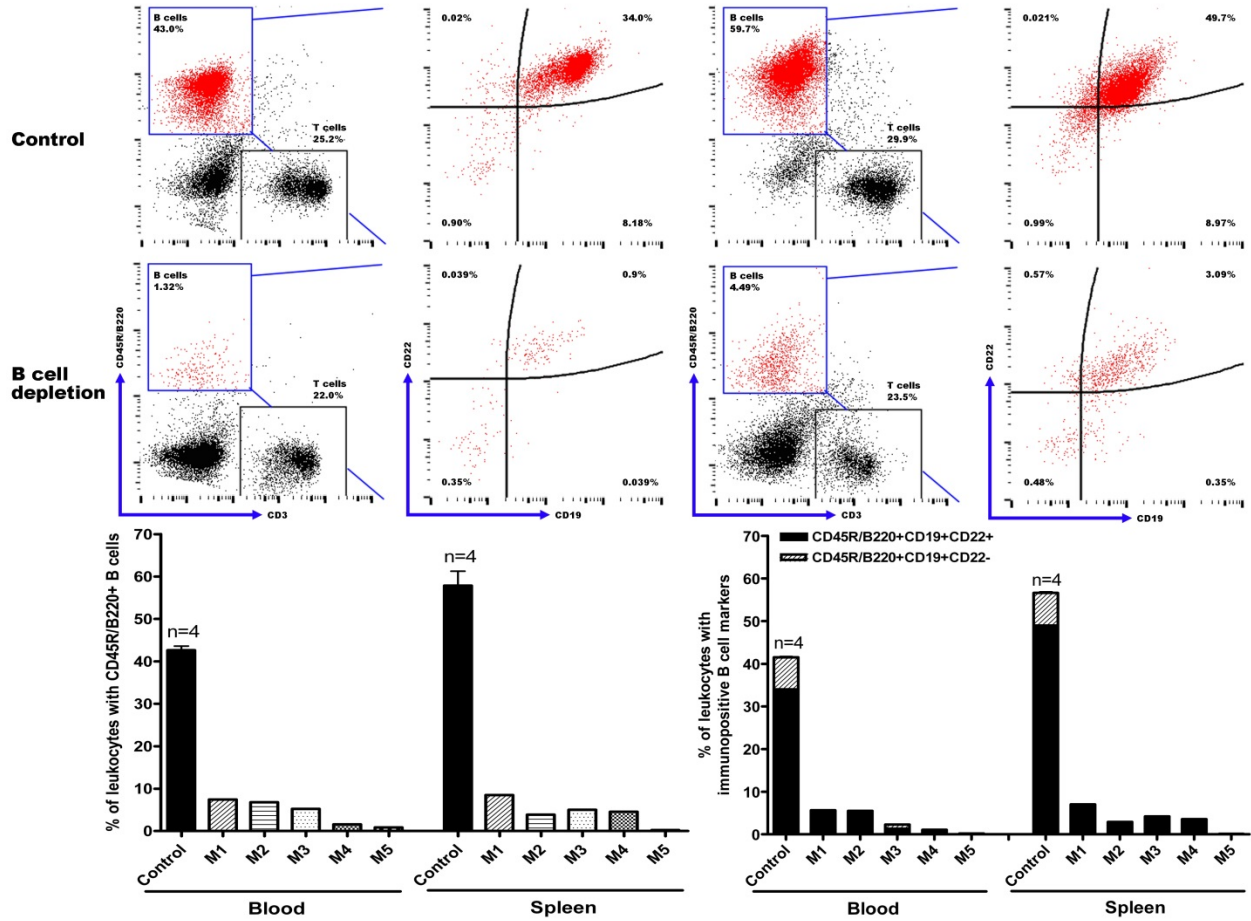

**b**

B LYMPHOCYTES

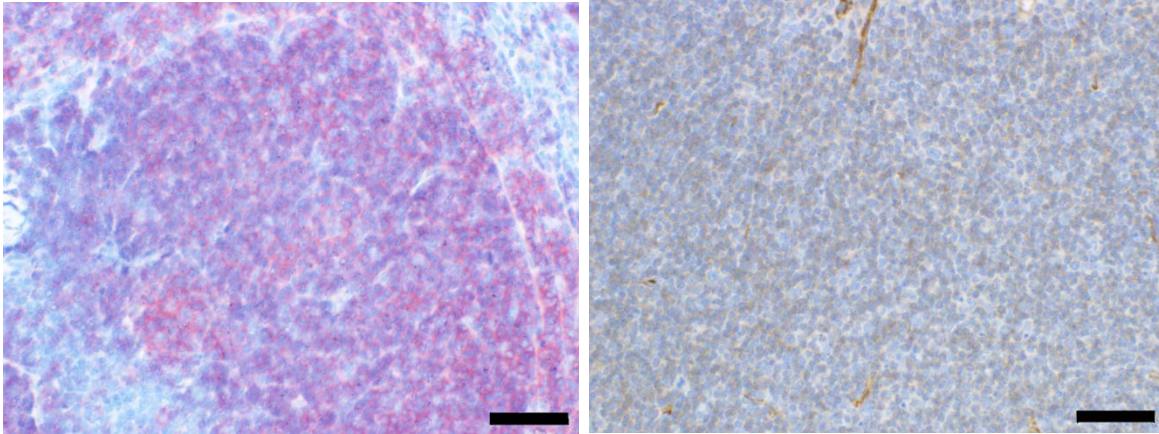

Untreated control

Anti-BR3 treatment

T LYMPHOCYTES

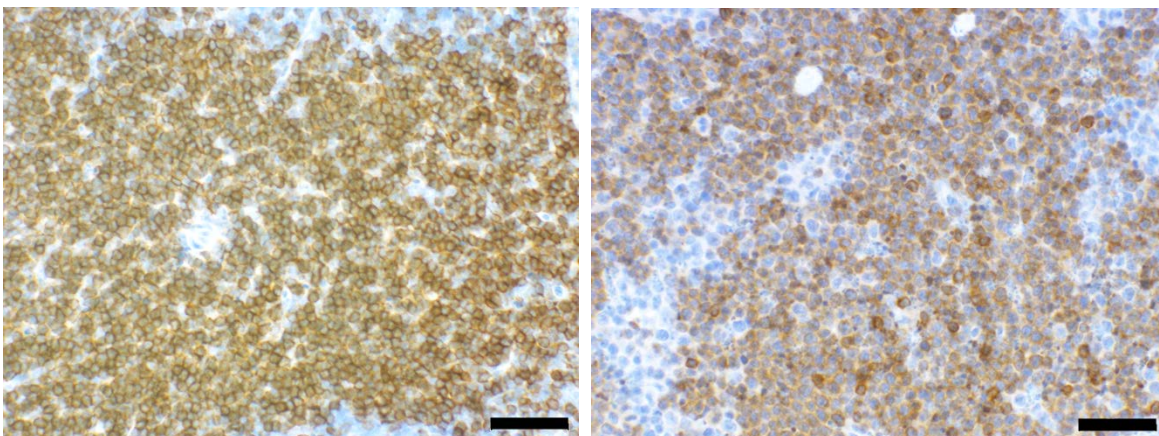

Untreated control

Anti-BR3 treatment

**Supplementary Fig. 1** Depletion of B lymphocytes in a CCM murine model. **a)** The numbers of CD45R/B220 positive B cells were reduced in both peripheral blood and spleen from 5 anti-BR3 antibody treated *Pdcd10<sup>+/+</sup>Trp53<sup>-/-</sup>* mice (M1-M5) compared to 4 similar mice that were not treated (control), while the amounts CD3 positive T cells were not affected. **b)** Immunohistochemistry showed similar results in the spleen. Scale bars are 50  $\mu$ m

## Supplementary Figure 2

### ANGIOSARCOMA

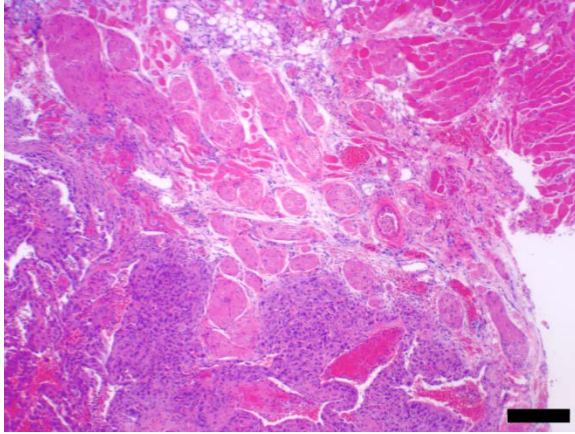

Hematoxylin and eosin

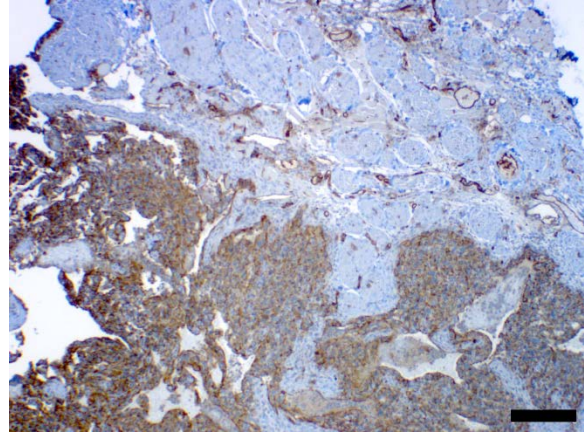

CD31

### LYMPHOMA

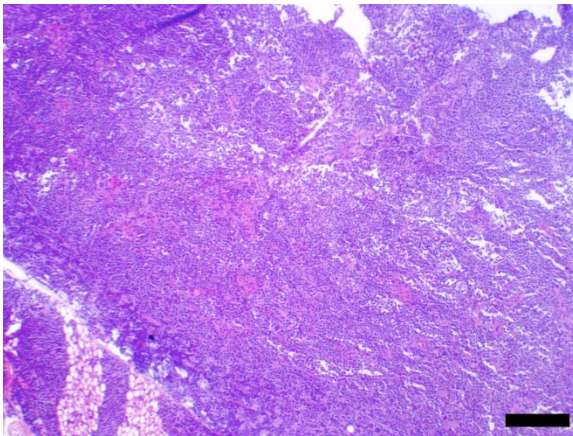

Hematoxylin and eosin

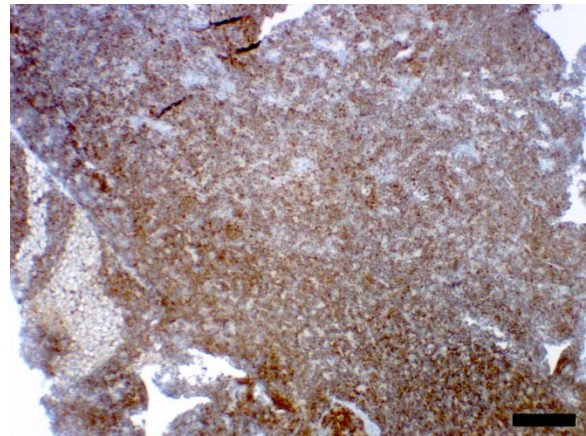

CD3

**Supplementary Fig. 2** Tumors from a sensitized murine model after B cell depletion. Formalin fixed paraffin embedded tumors from 2 *Pdcd10*<sup>+/-</sup>*Trp53*<sup>-/-</sup> mice treated with anti-BR3 were stained with hematoxylin and eosin (left panels), anti-CD31 antibody (upper right) or anti-CD3 antibody (lower right) to identify them as an angiosarcoma (top panels) or a T-cell lymphoma (lower panels). Scale bars are 200  $\mu$ m
